# Supplementary material for: Structure and Characteristics of Plant-Frugivore Network in an Urban Park: A Case Study in Nanjing Botanical Garden Mem. Sun Yat-Sen
Source: MDPI journal article supplement (doi:10.3390/d14020071), 2022-01-21
Supplement: s1 [file s1]

Table S1 Comparison of network roles of plants with different traits of plants

| Plant traits | <i>K-W<br/>Test</i> | Species<br>strength | degree | <i>Anova<br/>Test</i> | Effective<br>partners | Partner<br>diversity | Specializ<br>ation |
|--------------|---------------------|---------------------|--------|-----------------------|-----------------------|----------------------|--------------------|
| Origin       | X2                  | 20.00               | 8.98   | F                     | 0.01                  | 0.01                 | 1.84               |
|              | df                  | 20.00               | 13.00  | df                    | 1.00                  | 1.00                 | 1.00               |
|              | P                   | 0.46                | 0.70   | P                     | 0.91                  | 0.91                 | 0.19               |
| Life form    | X2                  | 20.00               | 13.66  | F                     | 0.02                  | 0.02                 | 0.56               |
|              | df                  | 20.00               | 12.00  | df                    | 2.00                  | 2.00                 | 2.00               |
|              | P                   | 0.46                | 0.32   | P                     | 0.98                  | 0.98                 | 0.58               |
| Fruit type   | X2                  | 20.00               | 9.56   | F                     | 0.02                  | 0.02                 | 1.00               |
|              | df                  | 20.00               | 12.00  | df                    | 2.00                  | 2.00                 | 2.00               |
|              | P                   | 0.46                | 0.65   | P                     | 0.98                  | 0.98                 | 0.39               |
| Fruit color  | X2                  | 20.00               | 12.34  | F                     | 6.42                  | 6.42                 | 0.31               |
|              | df                  | 20.00               | 12.00  | df                    | 2.00                  | 2.00                 | 2.00               |
|              | P                   | 0.46                | 0.42   | P                     | 0.01                  | 0.08                 | 0.73               |
| Fructescence | X2                  | 20.00               | 11.77  | F                     | 1.18                  | 1.18                 | 0.62               |
|              | df                  | 20.00               | 12.00  | df                    | 2.00                  | 2.00                 | 2.00               |
|              | P                   | 0.46                | 0.46   | P                     | 0.33                  | 0.33                 | 0.55               |
