# Supplementary material for: Structure and Characteristics of Plant-Frugivore Network in an Urban Park: A Case Study in Nanjing Botanical Garden Mem. Sun Yat-Sen
Source: MDPI journal article supplement (doi:10.3390/d14020071), 2022-01-21

Figure S6. Cluster analysis based on the species strength, effective partner and PC1 scores for (a) fruit plants; (b) frugivore birds.

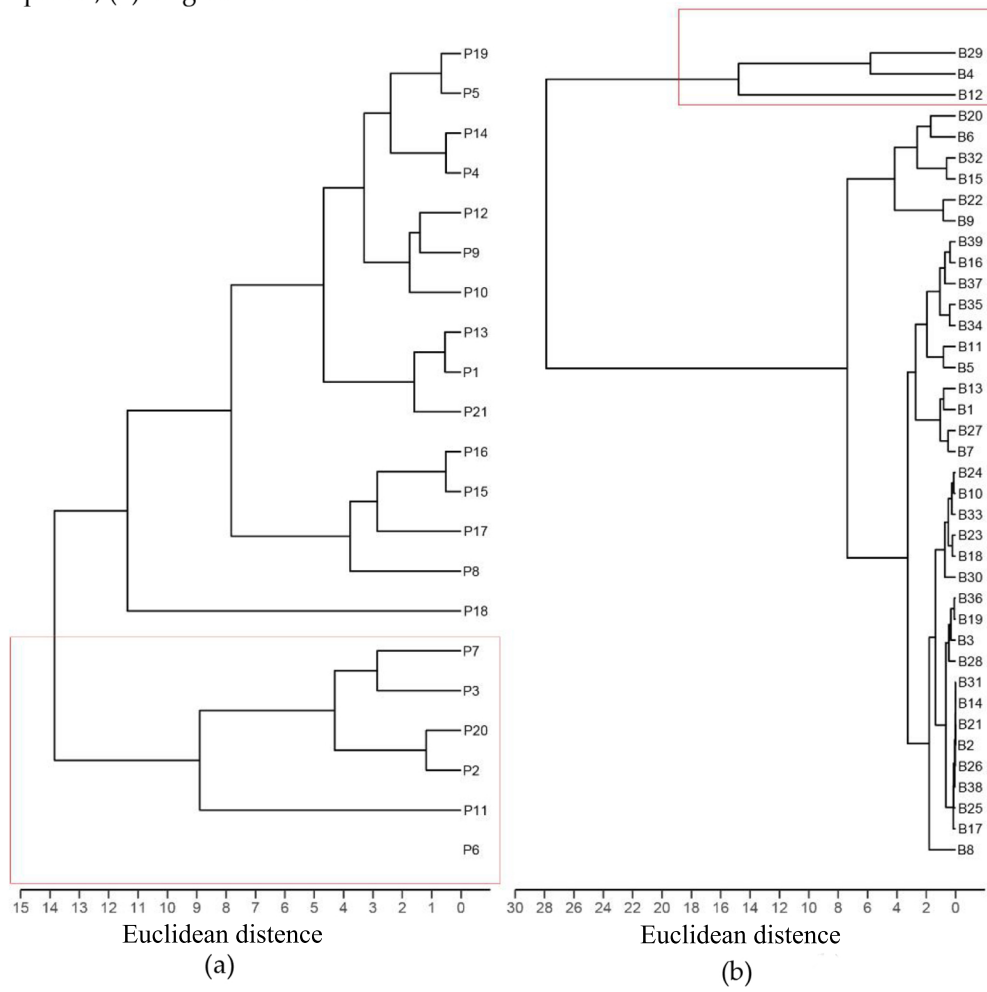

Supplement: s1 [file s1]
