# Supplementary material for: Structure and Characteristics of Plant-Frugivore Network in an Urban Park: A Case Study in Nanjing Botanical Garden Mem. Sun Yat-Sen
Source: MDPI journal article supplement (doi:10.3390/d14020071), 2022-01-21

**Figure S2. Regression of number of species (frugivore birds and fruit plants) and their connections**

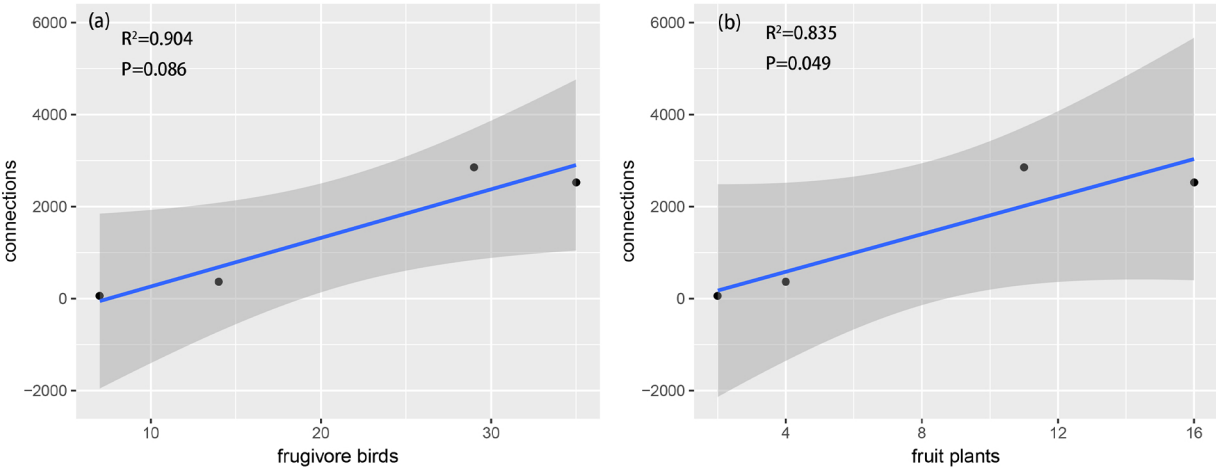

Supplement: s1 [file s1]
