# Supplementary material for: Structure and Characteristics of Plant-Frugivore Network in an Urban Park: A Case Study in Nanjing Botanical Garden Mem. Sun Yat-Sen
Source: MDPI journal article supplement (doi:10.3390/d14020071), 2022-01-21
Supplement: s1 [file s1]

Table S2 Comparison of network roles of plants with different traits of birds

| Bird traits | <i><b>K-W<br/>Test</b></i> | degree | Partner<br>diversity | Effective<br>partners | Specializa<br>tion | <i><b>Anova<br/>Test</b></i> | Species<br>strength |
|-------------|----------------------------|--------|----------------------|-----------------------|--------------------|------------------------------|---------------------|
| Resident    | X2                         | 14.32  | 27.04                | 29.48                 | 26.24              | F                            | 0.83                |
|             | df                         | 12.00  | 29.00                | 30.00                 | 26.00              | df                           | 2.00                |
|             | P                          | 0.28   | 1.57                 | 0.49                  | 0.45               | P                            | 0.45                |
| Diet        | X2                         | 8.00   | 28.44                | 29.19                 | 22.42              | F                            | 1.13                |
|             | df                         | 12.00  | 29.00                | 30.00                 | 26.00              | df                           | 2.00                |
|             | P                          | 0.79   | 0.49                 | 0.51                  | 0.67               | P                            | 0.34                |
| Habitat     | X2                         | 9.56   | 23.17                | 23.17                 | 22.52              | F                            | 0.48                |
|             | df                         | 12.00  | 29.00                | 30.00                 | 26.00              | df                           | 3.00                |
|             | P                          | 0.65   | 0.80                 | 0.81                  | 0.66               | P                            | 0.70                |
